# Supplementary material for: Cerebral Protection in TAVR—Can We Do Without? A Real-World All-Comer Intention-to-Treat Study—Impact on Stroke Rate, Length of Hospital Stay, and Twelve-Month Mortality
Source: MDPI journal article supplement (doi:10.3390/jpm12020320), 2022-02-21
Supplement: s1 [file s1]

**Supplemental Table S1. Propensity-score matched analysis - Cerebrovascular events at 72 hours**

| <b>Propensity-score matched analysis</b>   |                           |                  |
|--------------------------------------------|---------------------------|------------------|
|                                            | <b>Odds ratio (95%CI)</b> | <b>p-Value</b>   |
| <b><i>Baseline characteristics</i></b>     |                           |                  |
| Sex, female                                | 0.828 (0.272-2.519)       | 0.739            |
| Age                                        | 1.012 (0.945-1.085)       | 0.730            |
| Body mass index                            | 1.007 (0.916-1.107)       | 0.539            |
| Arterial hypertension                      | 0.671 (0.188-2.392)       | 0.552            |
| Diabetes mellitus                          | 1.323 (0.526-3.325)       | 0.552            |
| Peripheral artery disease                  | 0.386 (0.050-2.963)       | 0.360            |
| Coronary artery disease                    | 1.885 (0.663-5.359)       | 0.235            |
| Carotid stenosis >70%                      | 2.164 (0.747-6.268)       | 0.155            |
| Hyperlipidemia                             | 1.470 (0.480-4.505)       | 0.500            |
| Previous stroke                            | -                         |                  |
| Atrial fibrillation                        | 1.108 (0.401-3.060)       | 0.844            |
| COPD                                       | 1.510 (0.421-5.414)       | 0.527            |
| Previous cardiac surgery                   | 1.495 (0.478-4.676)       | 0.489            |
| Previous syncope                           | 1.570 (0.495-4.981)       | 0.444            |
| NYHA functional class                      | 0.945 (0.520-1.716)       | 0.853            |
| CCS≥III                                    | 1.172 (0.260-5.277)       | 0.836            |
| NT-proBNP (log.)                           | 0.686 (0.297-1.585)       | 0.378            |
| Creatinine                                 | 0.745 (0.353-1.571)       | 0.439            |
| Oral anticoagulation                       | 1.965 (0.751-5.141)       | 0.169            |
| SAPT                                       | 1.732 (0.670-4.474)       | 0.257            |
| DAPT                                       | 0.685 (0.221-2.119)       | 0.511            |
| EuroSCORE II                               | 1.018 (0.955-1.085)       | 0.593            |
| <b><i>Echocardiographic parameters</i></b> |                           |                  |
| AV mPG                                     | 0.980 (0.947-1.014)       | 0.240            |
| AV pPG                                     | 0.993 (0.971-1.015)       | 0.519            |
| AVA                                        | 1.726 (0.126-23.551)      | 0.682            |
| AV Vmax                                    | 0.787 (0.387-1.598)       | 0.507            |
| LVEF                                       | 0.990 (0.944-1.037)       | 0.664            |
| <b><i>Procedural characteristics</i></b>   |                           |                  |
| Self-expanding valve                       | 1.373 (0.364-5.188)       | 0.640            |
| Sentinel™                                  | 0.115 (0.026-0.505)       | <b>0.004</b>     |
| Valve size                                 | 1.081 (0.925-1.264)       | 0.325            |
| Predilation                                | 0.885 (0.296-2.648)       | 0.828            |
| Postdilation                               | 1.179 (0.397-3.498)       | 0.767            |
| Procedure time                             | 1.012 (1.002-1.021)       | 0.19             |
| Implantation >1 valve                      | 23.609 (4.432-125.763)    | <b>&lt;0.001</b> |
| Fluoroscopy time                           | 1.053 (1.012-1.095)       | <b>0.011</b>     |

AV indicates aortic valve; AVA, aortic valve area; CCS, Canadian Cardiovascular Society; COPD, chronic obstructive pulmonary disease; DAPT, dual antiplatelet therapy; log, logarithmized; LVEF, left ventricular ejection fraction; mPG, mean pressure gradient; NYHA, New York Heart Association; pPG, peak pressure gradient; NT-proBNP, N-terminal pro brain natriuretic peptide; SAPT, single antiplatelet therapy; Vmax, maximal velocity

**Supplemental Table S2 – Propensity-score matched analysis - Six months mortality**

| <b>Propensity-score matched analysis</b>   |                           |                  |
|--------------------------------------------|---------------------------|------------------|
|                                            | <b>Odds ratio (95%CI)</b> | <b>p-Value</b>   |
| <b><i>Baseline characteristics</i></b>     |                           |                  |
| Sex, female                                | 2.698 (1.359-5.356)       | <b>0.005</b>     |
| Age                                        | 0.996 (0.955-1.038)       | 0.836            |
| Body mass index                            | 0.987 (0.930-1.048)       | 0.672            |
| Arterial hypertension                      | 0.534 (0.260-1.098)       | 0.088            |
| Diabetes mellitus                          | 1.582 (0.908-2.755)       | 0.105            |
| Peripheral artery disease                  | 2.323 (1.190-4.531)       | <b>0.013</b>     |
| Coronary artery disease                    | 1.485 (0.797-2.769)       | 0.213            |
| Carotid stenosis >70%                      | 1.687 (0.844-3.372)       | 0.139            |
| Hyperlipidemia                             | 0.789 (0.436-1.429)       | 0.435            |
| Previous stroke                            | 0.761 (0.237-2.444)       | 0.646            |
| Atrial fibrillation                        | 2.525 (1.355-4.706)       | <b>0.004</b>     |
| COPD                                       | 1.031 (0.438-2.426)       | 0.943            |
| Previous cardiac surgery                   | 2.016 (1.049-3.873)       | <b>0.035</b>     |
| Previous syncope                           | 1.152 (0.557-2.379)       | 0.703            |
| NYHA functional class                      | 1.886 (1.183-3.007)       | <b>0.008</b>     |
| CCS≥III                                    | 0.625 (0.195-2.010)       | 0.431            |
| NT-proBNP (log.)                           | 1.367 (1.095-1.707)       | <b>0.006</b>     |
| Creatinine                                 | 1.169 (0.941-1.451)       | 0.159            |
| Oral anticoagulation                       | 1.530 (0.842-2.781)       | 0.163            |
| SAPT                                       | 1.214 (0.648-2.275)       | 0.545            |
| DAPT                                       | 0.882 (0.444-1.749)       | 0.718            |
| EuroSCORE II                               | 1.056 (1.026-1.087)       | <b>&lt;0.001</b> |
| <b><i>Echocardiographic parameters</i></b> |                           |                  |
| AV mPG                                     | 0.978 (0.958-0.998)       | <b>0.031</b>     |
| AV pPG                                     | 0.983 (0.969-0.997)       | <b>0.018</b>     |
| AVA                                        | 1.844 (0.360-9.438)       | 0.462            |
| AV Vmax                                    | 0.602 (0.390-0.930)       | <b>0.022</b>     |
| LVEF                                       | 0.980 (0.952-1.008)       | 0.167            |
| <b><i>Procedural characteristics</i></b>   |                           |                  |
| Self-expanding valve                       | 0.906 (0.394-2.083)       | 0.817            |
| Sentinel™                                  | 0.484 (0.265-0.884)       | <b>0.018</b>     |
| Valve size                                 | 1.064 (0.969-1.169)       | 0.195            |
| Predilation                                | 0.735 (0.390-1.384)       | 0.340            |
| Postdilation                               | 0.773 (0.390-1.530)       | 0.459            |
| Procedure time                             | 1.014 (1.008-1.021)       | <b>&lt;0.001</b> |
| Implantation >1 valve                      | 2.781 (0.676-11.441)      | 0.156            |
| Fluoroscopy time                           | 1.026 (0.999-1.053)       | 0.063            |

AV indicates aortic valve; AVA, aortic valve area; CCS, Canadian Cardiovascular Society; COPD, chronic obstructive pulmonary disease; DAPT, dual antiplatelet therapy; log, logarithmized; LVEF, left ventricular ejection fraction; mPG, mean pressure gradient; NYHA, New York Heart Association; pPG, peak pressure gradient; NT-proBNP, N-terminal pro brain natriuretic peptide; SAPT, single antiplatelet therapy; Vmax, maximal velocity

Supplemental Table S3 – Propensity-score matched analysis - Length of hospital stay

| Propensity-score matched analysis          |                                   |                  |
|--------------------------------------------|-----------------------------------|------------------|
|                                            | Regression coefficient<br>(95%CI) | p-Value          |
| <b><i>Baseline characteristics</i></b>     |                                   |                  |
| Sex, female                                | 0.478 (-1.425, 2.380)             | 0.622            |
| Age                                        | 0.134 (0.017, 0.251)              | <b>0.024</b>     |
| Body mass index                            | -0.085 (-0.236, 0.066)            | 0.271            |
| Arterial hypertension                      | -0.699 (-3.224, 1.826)            | 0.587            |
| Diabetes mellitus                          | 0.542 (-1.125, 2.209)             | 0.523            |
| Peripheral artery disease                  | 0.821 (-1.662, 3.304)             | 0.516            |
| Coronary artery disease                    | 1.940 (0.297, 3.583)              | <b>0.021</b>     |
| Carotid stenosis >70%                      | -0.535 (-2.841, 1.772)            | 0.649            |
| Hyperlipidemia                             | -0.509 (-2.287, 1.269)            | 0.574            |
| Previous stroke                            | 0.008 (-2.998, 3.015)             | 0.996            |
| Atrial fibrillation                        | 0.805 (-0.969, 2.578)             | 0.373            |
| COPD                                       | -0.453 (-2.934, 2.028)            | 0.720            |
| Previous cardiac surgery                   | -0.280 (-2.529, 1.968)            | 0.807            |
| Previous syncope                           | 2.247 (0.144, 4.349)              | <b>0.036</b>     |
| NYHA functional class                      | 0.758 (-0.246, 1.761)             | 0.138            |
| CCS≥III                                    | -0.309 (-3.078, 2.459)            | 0.826            |
| NT-proBNP (log.)                           | 2.326 (1.030, 3.622)              | <b>&lt;0.001</b> |
| Creatinine                                 | 0.643 (-0.216, 1.502)             | 0.142            |
| Oral anticoagulation                       | 0.177 (-1.568, 1.921)             | 0.842            |
| SAPT                                       | 0.470 (-1.308, 2.249)             | 0.603            |
| DAPT                                       | -0.048 (-1.876, 1.780)            | 0.959            |
| EuroSCORE II                               | 0.117 (-0.013, 0.247)             | 0.078            |
| <b><i>Echocardiographic parameters</i></b> |                                   |                  |
| AV mPG                                     | -0.030 (-0.084, 0.024)            | 0.275            |
| AV pPG                                     | -0.003 (-0.040, 0.034)            | 0.871            |
| AVA                                        | -4.489 (-10.387, -0.791)          | <b>0.023</b>     |
| AV Vmax                                    | 0.085 (-1.188, 1.358)             | 0.896            |
| LVEF                                       | -0.101 (-0.192, -0.009)           | <b>0.031</b>     |
| <b><i>Procedural characteristics</i></b>   |                                   |                  |
| Self-expanding valve                       | 2.665 (0.345, 4.984)              | <b>0.024</b>     |
| Sentinel <sup>TM</sup>                     | -2.005 (-3.561, -0.450)           | <b>0.012</b>     |
| Valve size                                 | -0.027 (-0.317, 0.263)            | 0.856            |
| Predilation                                | -1.022 (-2.866, 0.823)            | 0.277            |
| Postdilation                               | -1.063 (-2.939, 0.830)            | 0.263            |
| Procedure time                             | 0.024 (-0.002, 0.050)             | 0.073            |
| Implantation >1 valve                      | 3.382 (-2.644, 9.408)             | 0.271            |
| Fluoroscopy time                           | 0.128 (0.037, 0.219)              | <b>0.006</b>     |

AV indicates aortic valve; AVA, aortic valve area; CCS, Canadian Cardiovascular Society; COPD, chronic obstructive pulmonary disease; DAPT, dual antiplatelet therapy; log, logarithmized; LVEF, left ventricular ejection fraction; mPG, mean pressure gradient; NYHA, New York Heart Association; pPG, peak pressure gradient; NT-proBNP, N-terminal pro brain natriuretic peptide; SAPT, single antiplatelet therapy; Vmax, maximal velocity
